# Supplementary material for: A novel type of light-harvesting antenna protein of red algal origin in algae with secondary plastids
Source: PubMed Central journal article supplement (PMC3750529; doi:10.1186/1471-2148-13-159), 2013-07-30
Supplement: 1471-2148-13-159-S4.pdf [file 1471-2148-13-159-S4.pdf]

| name    | organism       | helix I                                           | helix II                                         | helix III                                              |
|---------|----------------|---------------------------------------------------|--------------------------------------------------|--------------------------------------------------------|
| Lhcbm1  | Chlamydomonas  | PETFKRYR <b>E</b> LELI <b>H</b> ARWAMLGALGCIPELLG | ILAILGT <b>Q</b> VLLMGA <b>I</b> EGY <b>R</b> VN | PDTFAELKVK <b>E</b> IK <b>N</b> GR <b>L</b> AMFMSMFGFF |
| Lhcb1.1 | Arabidopsis    | PETFARNR <b>E</b> LEVI <b>H</b> SRWAMLGALGCVPELLA | ILAIWAT <b>Q</b> VILMGAV <b>E</b> GY <b>R</b> VA | PEAFaelkV <b>K</b> EL <b>K</b> N <b>R</b> LAMFMSMFGFF  |
| FCP a   | Phaeodactylum  | QEKFDRLRYVEIKHGRICMLAVAGYLTQEAGI                  | IIFAFIGFLEIAVMKDITGGEF                           | EDKKLQKRAIELNQGAAQMGLALM                               |
| LHC     | Ectocarpus     | QERFDRLRYVEIKHGRIAMLAAILGHITAQNFR                 | IPLFIGFLETkVMLQKEGSFP                            | EEEQATKRAIELNNGRAAQMGLGLM                              |
| RedCAP  | Phaeodactylum  | KWGWGPSVQAEKWNGRHAMFGWFFICATAYCK                  | IILV <b>NA</b> HFFALSIAATICPL                    | SLFVGLTEEAIEINGRLAMLGLVMLI                             |
| RedCAP  | Fragilariopsis | XXGWGPSVHAEKWNGRHAMFGWFFICCTAYAK                  | VILL <b>NA</b> HFFAISLMATICPL                    | SLLGLTEEAEMINGRLAMLGLISLI                              |
| RedCAP  | Thalassiosira  | AWGWGPSVQAEIWNNGRHAMFGWVMCAYAK                    | IIL <b>IAN</b> VH <b>AL</b> MVGLAATISPN          | TLLGLVTPAEELANGRMAMMGIITCI                             |
| RedCAP  | Aureococcus    | SYGWGSAKAERWNGRHAMFGWVFIVATGYCQ                   | CIL <b>IAN</b> V <b>H</b> FLMVSLCAAWCPL          | TLLGLTPAAEMWNGRLAMLGLVVVS                              |
| RedCAP  | Ectocarpus     | KYWGPTAKAERWNGRHAMFGWAAIATGYCQ                    | IIM <b>GH</b> V <b>H</b> ALAVSVCATVAPL           | KLFLGLTPEAEIFNGRMAMMGLVVTA                             |
| RedCAP  | Emiliana       | KYGFPTVKAERWNGRHAMFGWAAIATGVAK                    | IIM <b>IA</b> H <b>V</b> HALAVSAAAAGFPQ          | SLTLGLSPAEMANGRLAMLGLIAVV                              |
| RedCAP  | Isochrysis     | KYGFGPSVKAERWNGRHAMFGWMAIATGVAK                   | IIM <b>IA</b> H <b>V</b> HALAFSFAAAGFPQ          | SLTLGLTPAAEMANGRVAMVGLISVV                             |
| RedCAP  | Diacronema     | KRGFGPTTKAERWNGRHAMFGWVILATGYAQ                   | IIL <b>IA</b> H <b>V</b> HALFVSLASSLSPF          | SLTLGLTAAEMMNGRLAMLGLIAAV                              |
| RedCAP  | Galdieria      | SRGLGVTSKAERWNGRHAMFGLLAIIVLTGYAK                 | IVLV <b>AH</b> I <b>H</b> VLLVSIAAAIAFP          | RLLGLTKEAELWNGRLAMLGLVTFIV                             |
| RedCAP  | Guillardia     | SRGLGVTNAERWNGRHAMFGIFMVLSSYLH                    | IILV <b>AH</b> V <b>H</b> VLFVSIILAAFAP          | TLVKGLTAEELINGRLAMLGLISIT                              |
| RedCAP  | Gracilaria     | ARGWGATVKAERWNGRHAMFGFVMLVATAYCK                  | VILV <b>AH</b> I <b>H</b> VLMVSVAAALAPF          | TLLGLTKSAELYNCRLAMLGLMVVV                              |
| RedCAP  | Griffithsia    | ERGWGATVKAERWNGRHVMFGWLVFWITAYCK                  | IVLV <b>AH</b> I <b>H</b> VLFVSIAAAIAFP          | KLLGLTKDAEINWNGRVAMVGLICLV                             |
| RedCAP  | Pyropia        | KRGWGATVKAERWNGRHVMAGWVILVATGFVK                  | IIL <b>IA</b> H <b>V</b> LLFVSVAAALAPF           | KLLGLTKDAEMWNGRVAMVGLMLVLV                             |

Figure S2
