# Supplementary material for: A novel type of light-harvesting antenna protein of red algal origin in algae with secondary plastids
Source: PubMed Central journal article supplement (PMC3750529; doi:10.1186/1471-2148-13-159), 2013-07-30
Supplement: 1471-2148-13-159-S5.pdf [file 1471-2148-13-159-S5.pdf]

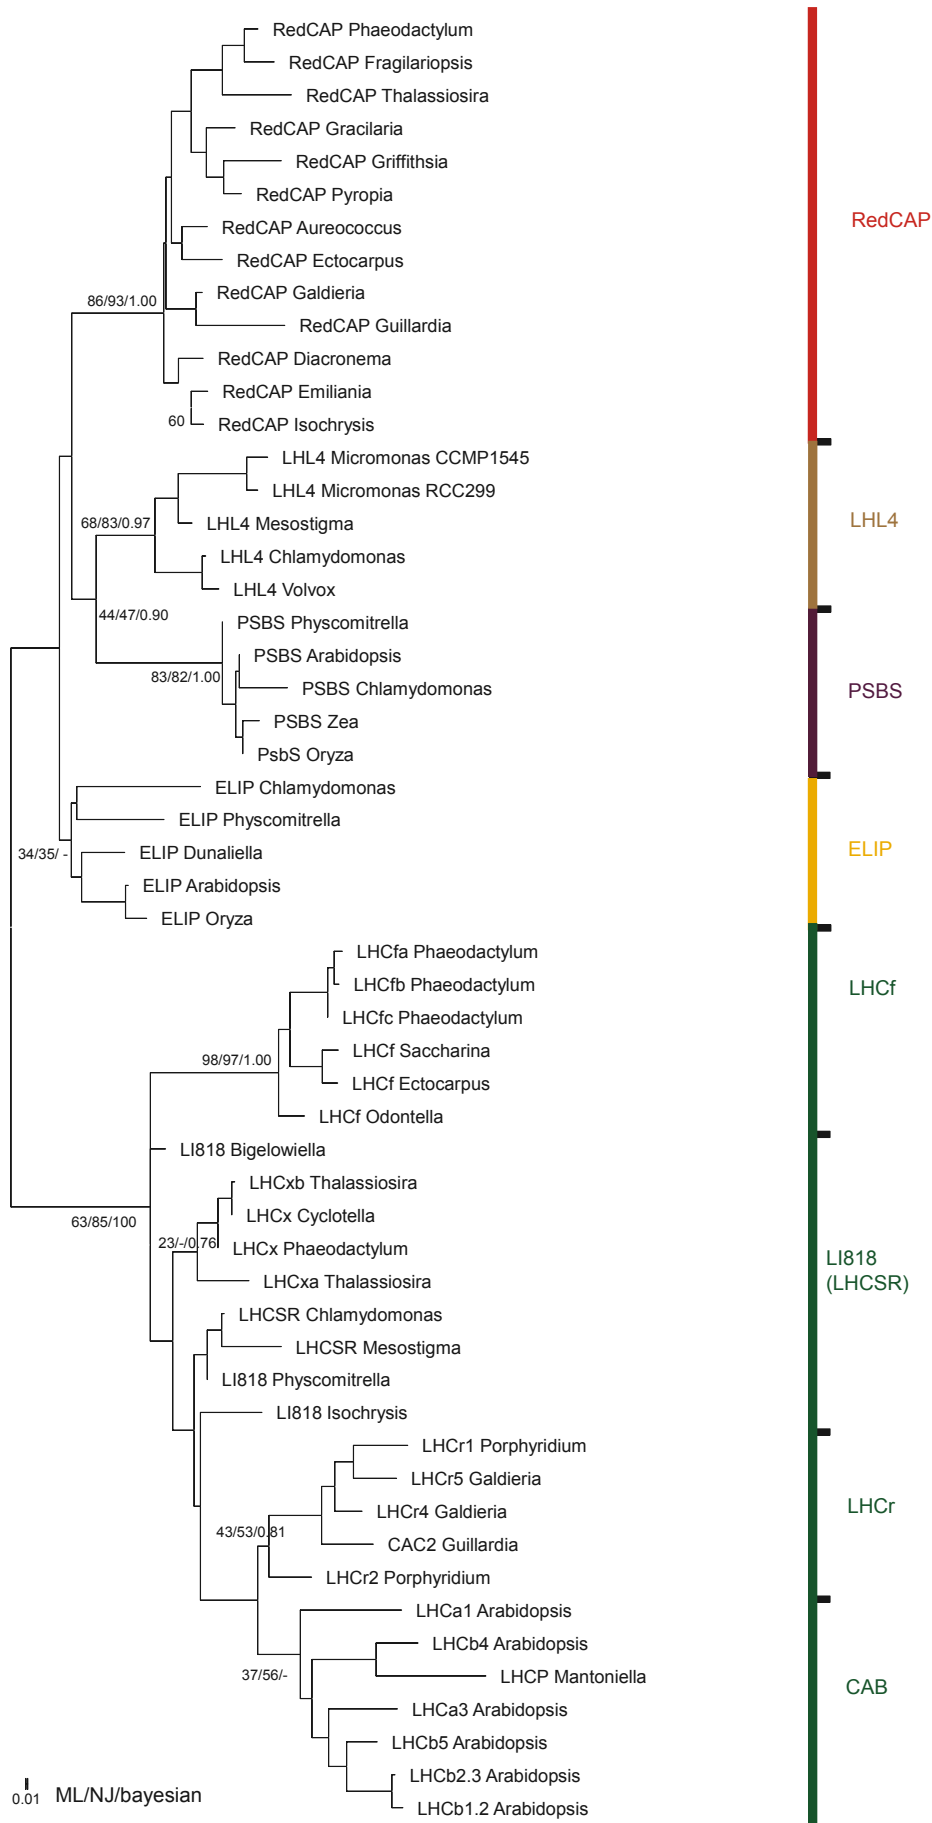

Figure S3
