# Supplementary material for: A novel type of light-harvesting antenna protein of red algal origin in algae with secondary plastids
Source: PubMed Central journal article supplement (PMC3750529; doi:10.1186/1471-2148-13-159), 2013-07-30
Supplement: 1471-2148-13-159-S11.pdf [file 1471-2148-13-159-S11.pdf]

**Table S4.** Primer sequences used for the real-time quantitative PCR analysis in *P. tricornutum*, the LHCF2 gene has been analysed with the primers designed by Siaut et al. [36] (the gene is called “FcpB” in the cited study).

| Primer name     | Primer sequence 5'-3'     |
|-----------------|---------------------------|
| RedCAP For      | CTTTGTCGACCCTAACCACCCT    |
| RedCAP Rev      | TTCGGCTTCTTCGGTAAGTCC     |
| LHCF2 For       | GCCGATATCCCCAATGGATTT     |
| LHCF2 Rev       | CTTGGTCGAAGGAGTCCCATC     |
| OHP1-like 1 For | GCCATCGGAAACCGAGAAA       |
| OHP1-like 1 Rev | CGAGTTCGACCGTATCCAATG     |
| OHP1-like 2 For | GCGCCAACCACTCTTTTCTG      |
| OHP1-like 2 Rev | GGGTAATACCAGTAACTGTGCCAAA |
| OHP2 For        | AAGAAACCTGGCGGAAGGAA      |
| OHP2 Rev        | AGGAAGAACATGGCGAATCGT     |
| SEPX For        | GCAGAAATTTGGAATGGACGTG    |
| SEPX Rev        | CGCCTTCCTGTAGACCCTGAAT    |
| 18S rRNA For    | TGCCCTTTGTACACACCGC       |
| 18 rRNA Rev     | AAGTTCTCGCAACCAACACCA     |

Abbreviations: For, forward primer, Rev, reverse primer.
